# Supplementary material for: Ultrarapid Microwave-Assisted Synthesis of Fluorescent Silver Coordination Polymer Nanoparticles and Its Application in Detecting Alkaline Phosphatase Activity
Source: MDPI journal article supplement (doi:10.3390/molecules28041892), 2023-02-16
Supplement: s1 [file s1]

# Ultrarapid Microwave-Assisted Synthesis of Fluorescent Silver Coordination Polymer Nanoparticles and Its Application in Detecting Alkaline Phosphatase Activity

Kanglin Pei <sup>1</sup>, Di Li <sup>2</sup>, Wenjing Qi <sup>1,\*</sup> and Di Wu <sup>1</sup>

<sup>1</sup> Chongqing Key Laboratory of Green Synthesis and Applications, College of Chemistry, Chongqing Normal University, Chongqing 401331, China; 15023407406@163.com (K.P.); w316609175@163.com (D.W.)

<sup>2</sup> Department of Pharmacy, the Second Affiliated Hospital of Chongqing Medical University, Chongqing 401331, China; 303495@hospital.cqmu.edu.cn

\* Correspondence: [wenjingqi616@cqu.edu.cn](mailto:wenjingqi616@cqu.edu.cn)

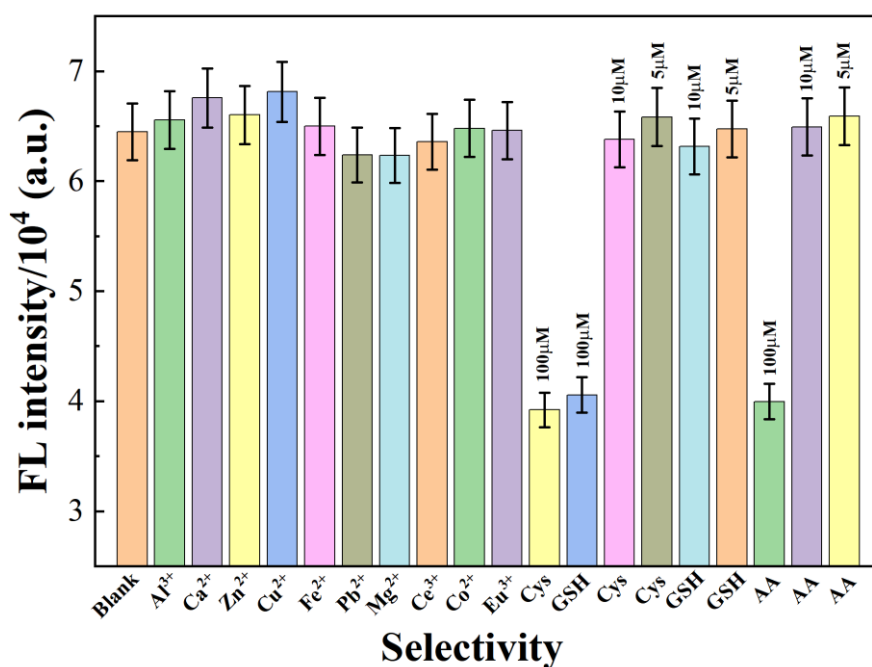

**Figure S1.** Fluorescent intensity of Ag-TPA CPNs in the presence of AA (100, 10 and 5  $\mu$ M) and other species ( $\text{Al}^{3+}$ ,  $\text{Ca}^{2+}$ ,  $\text{Zn}^{2+}$ ,  $\text{Cu}^{2+}$ ,  $\text{Fe}^{2+}$ ,  $\text{Pb}^{2+}$ ,  $\text{Mg}^{2+}$ ,  $\text{Ce}^{3+}$ ,  $\text{Co}^{2+}$ ,  $\text{Eu}^{3+}$ , Cys, GSH, 100  $\mu$ M). Cys: cysteine; GSH: glutathione. Ag-TPA CPNs solution: 50  $\mu$ L;  $\lambda_{\text{ex}}$ : 320 nm;  $\lambda_{\text{em}}$ : 490 nm. All the error bars represent the standard deviation of three measurements.
